# Supplementary material for: Lipid-lowering activity of metformin-soluble soybean polysaccharide nanoparticles
Source: Royal Society of Chemistry journal article supplement (doi:10.1039/d2fo01237e), 2022-01-01
Supplement: d2fo01237e1.pdf [file d2fo01237e1.pdf]

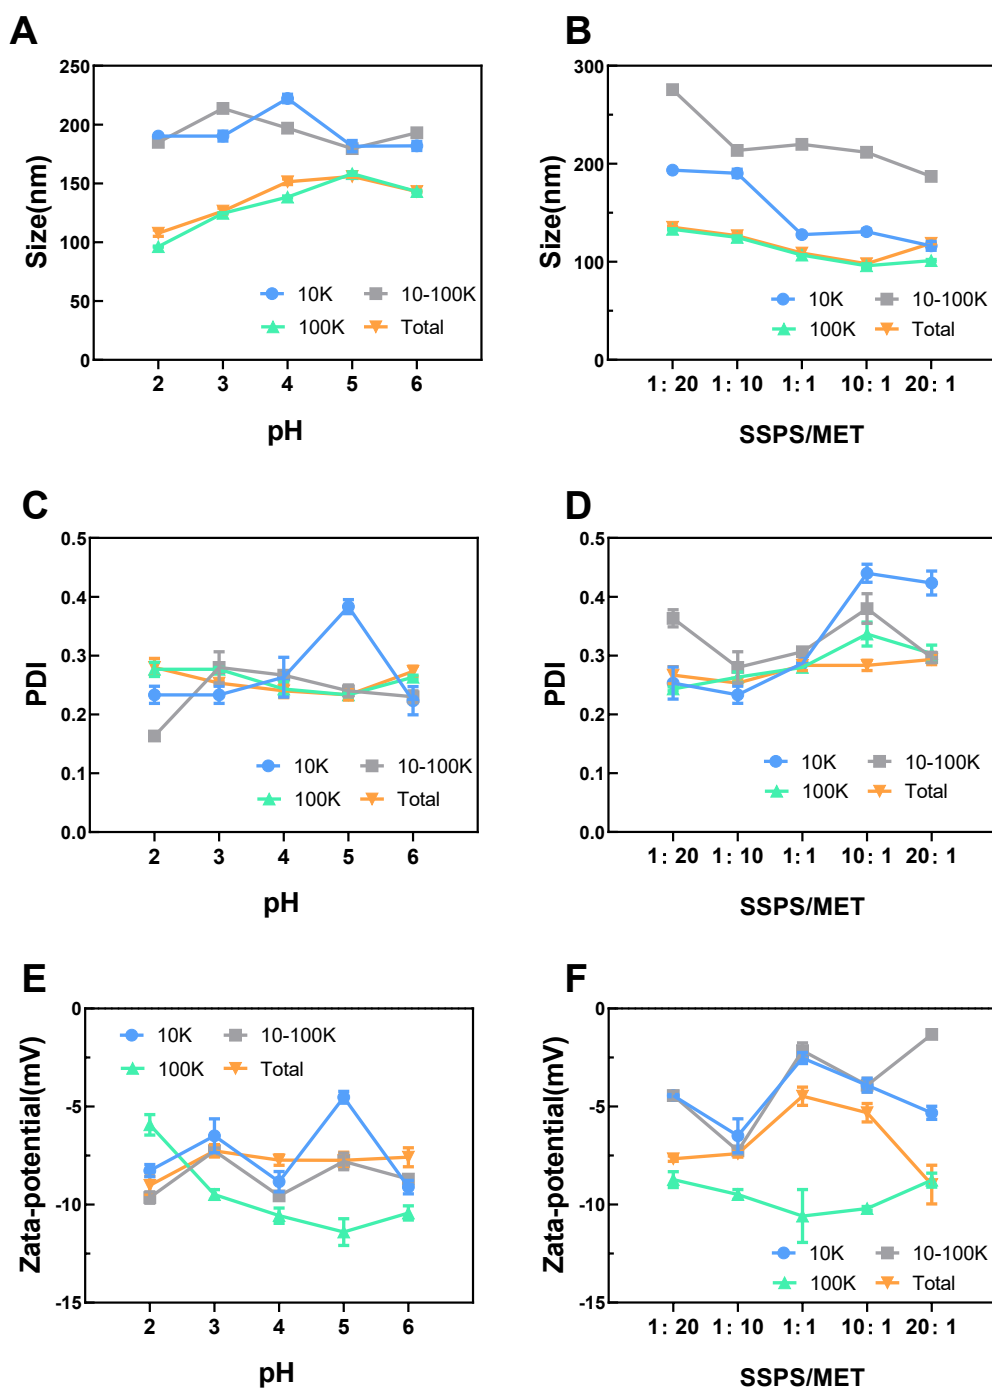

Figure S1 Characterization of MET-SSPS-NPs: (A) Size, (C) PDI, and (E) Zeta-potential of MET-SSPS-NPs prepared under different pH; (B) Size, (D) PDI, and (F) Zeta-potential of MET-SSPS-NPs prepared under different pH of different SSPS/MET ratio.

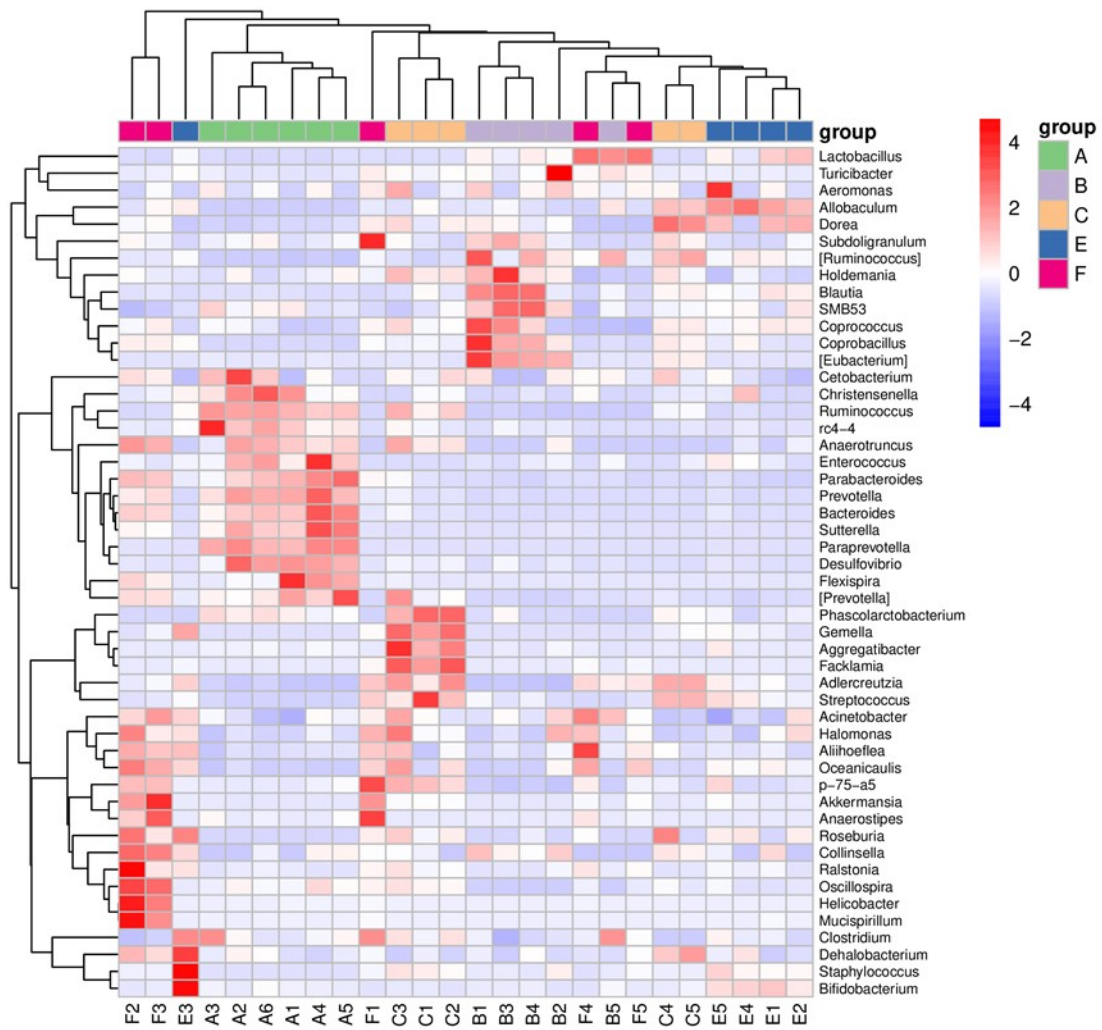

Figure S2 Different gut microbiota traits between groups: (A) Control, (B) HFD, (C) HFD+MET, (E) HFD+<10K and (F) HFD+<10K/MET.

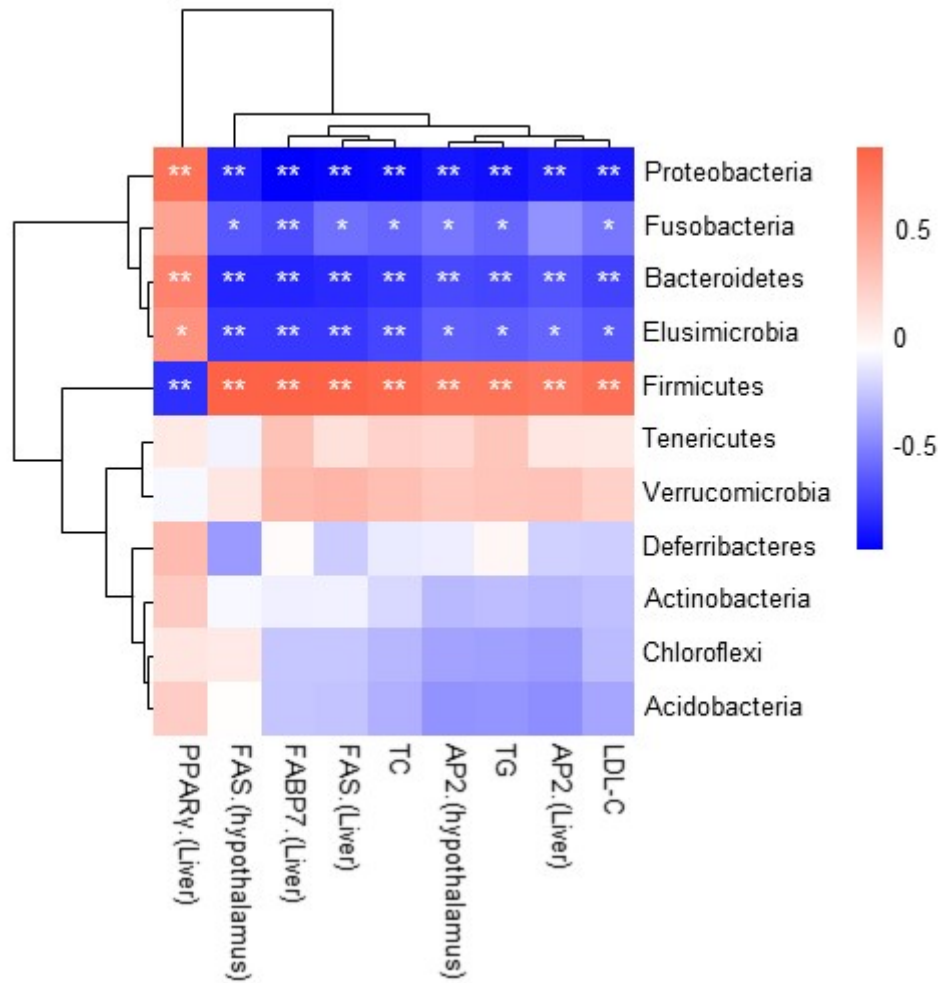

Figure S3 Correlation analysis between intestinal flora at the phylum level and obesity-related indicators.

**Table S1** Composition of SPSS

| Composition of SPSS | Content (%) |
|---------------------|-------------|
| Fucose              | 24.46       |
| Rhamnose            | 4.10        |
| Arabinose           | 11.23       |
| Xylose              | 18.44       |
| Glucose             | 15.66       |
| Xylose              | 26.11       |
